# Supplementary material for: Effects of Water Provision and Hydration on Cognitive Function among Primary-School Pupils in Zambia: A Randomized Trial
Source: PLoS One. 2016 Mar 7;11(3):e0150071. doi: 10.1371/journal.pone.0150071 (PMC4780815; doi:10.1371/journal.pone.0150071)
Supplement: S1 File — (XLS) [file pone.0150071.s001.xls]

## Sheet: Sheet1
arm	schoolid	color_am	sg_am	color_pm	sg_pm	blood	dehyd_colam	dehyd_colpm	dehyd_sgam	dehyd_sgpm	hyperhyd_am	hyperhyd_pm	testvers	lcc	lci	lcf	lcx	idc	idi	idf	idx	iic	iii	iif	iix	nfc	nfm	nfx	nrc	nrm	nrx	ltm	lte	ltf	p100	p101	p102	p103	p104	p105	p107	p108	p108_a	p108_b	p108_c	p108_oth	p110	p112	p120
0	2	7	1.025	7	1.027	0	0	0	0	0	1	1	1	22	0	22		2	2	0		1	2	-1		4	3		4	3		29	0	29	2	0	13	5	0	1	0		0	0	0		0	1	1
1	3	3.5	1.014	1	1	0	1	1	1	1	1	0	1	25	0	25		1	1	0		3	0	3		5	4		2	2		10	0	10	1	1	11	4	2	2	1	1,2	1	1	0		1	1	1
0	3	4	1.014	3	1.014	0	1	1	1	1	1	1	2	35	0	35		2	0	2		4	1	3		7	5		6	4		15	0	15	2	0	13	4	2	2	0		0	0	0		1	0	1
1	3	4	1.02	1	1	0	1	1	0	1	1	0	1	23	0	23		3	0	3		2	0	2		4	4		3	3		15	1	14	1	0	10	3	2	2	0		0	0	0		0	1	1
0	3	7	1.02	7.5	1.03	0	0	0	0	0	1	1	2	14	0	14		1	0	1		2	1	1		5	4				1	22	0	22	2	1	10	3	2	2	0		0	0	0		0	1	1
1	3	3	1.018			0	1	1	1		1																								1	0	9	3	2	2	0		0	0	0		1	1	1
0	3	4	1.019			0	1	1	1		1																								2	1	12	3	2	2	0		0	0	0		0	1	1
1	3	3	1.02			0	1	1	0		1																								1	1	13	3	2	2	0		0	0	0		0	1	1
0	3	6	1.023	6	1.028	0	0	0	0	0	1	1	2	17	0	17		4	0	4		1	1	0		5	4		3	3		19	0	19	2	1	10	3	2	2	0		0	0	0		1	0	1
1	2	6	1.024	1	1.003	0	0	0	0	1	1	1	1	13	0	13		1	0	1		4	0	4		7	5		3	3		11	1	10	1	1	10	3	0	1	0		0	0	0		0	1	1
0	3	3	1.016			0	1	1	1		1																								2	1	13	4	2	2	1	1	1	0	0		1	2	1
1	3	2	1.01	1	1.005	0	1	1	1	1	1	1	1				1				1				1			1			1	21	2	19	1	1	12	4	2	2	0		0	0	0		0	2	1
0	3	6	1.02			0	0		0		1																								2	0	11	3	2	2	0		0	0	0		0	2	1
1	3	6	1.022	1	1	0	0	0	0	1	1	0	1	24	0	24		3	0	3		2	0	2		6	4		4	3		13	1	12	1	1	9	4	2	2	1	2	0	1	0		1	2	1
0	3	4	1.021			0	1	1	0		1																								2	0	12	4	2	2	1	1	1	0	0		1	2	1
1	3	1.5	1.011	1	1	0	1	1	1	1	1	0	1	36	0	36		2	0	2		3	0	3		6	4		2	2		24	1	23	1	1	11	4	2	2	0		0	0	0		1	1	1
0	3	3.5	1.023	4	1.026	0	1	1	0	0	1	1																							2	0	10	3	2	2	0		0	0	0		0	1	1
1	3	4	1.019	1	1	0	1	1	1	1	1	0	1	22	0	22		2	0	2		2	1	1		5	5		4	3		19	1	18	1	1	13	3	2	2	0		0	0	0		1	1	1
0	2	6	1.023	2	1.003	0	0	0	0	1	1	1																							2	0	9	3	0	0	1	1	1	0	0		0	0	1
0	3	6	1.019	4	1.012	0	0	0	1	1	1	1	1	28	0	28		5	0	5		5	0	5		7	5		4	3		29	2	27	2	0	14	6	2	1	1	1	1	0	0		0	2	1
1	3	4	1.02	1	1.001	0	1	1	0	1	1	0	2	27	0	27		3	0	3		3	1	2		7	5		8	5		29	2	27	1	0	13	6	2	2	0		0	0	0		0	1	1
0	3	2	1.018	6	1.022	0	1	1	1	0	1	1	1	23	0	23		6	5	1		1	2	-1		4	3		3	4		29	1	28	2	0	13	6	2	2	0		0	0	0		0	2	1
1	3	4	1.016	1	1	0	1	1	1	1	1	0	2	33	0	33		1	0	1					1	5	4		2	2		29	3	26	1	0	16	6	2	2	0		0	0	0		0	0	1
0	3	4	1.02	6	1.026	0	1	1	0	0	1	1	1	15	1	14		2	0	2		3	0	3		8	5		3	3		29	1	28	2	0	13	6	2	2	0		0	0	0		0	2	1
0	2	3	1.019	5	1.025	0	1	1	1	0	1	1	2	10	0	10		0	0	0		1	1	0		5	4		3	3		19	3	16	2	0	12	3	0	0	0		0	0	0		0	0	1
0	3	3	1.014	4	1.017	0	1	1	1	1	1	1	1	31	0	31		4	0	4		3	0	3		8	5		5	4		29	2	27	2	0	11	6	2	2	0		0	0	0		0	1	1
1	3	7	1.031	1	1.001	0	0	0	0	1	1	0	2	33	0	33		5	1	4		3	3	0		6	4		8	5		29	8	21	1	0	14	6	1	1	0		0	0	0		1	2	1
0	3	6	1.018	4	1.015	0	0	0	1	1	1	1	1	31	1	30		1	1	0		4	0	4		5	4		4	4		23	2	21	2	1	13	6	2	2	1		0	0	0		0	1	1
1	3	3	1.02	1	1.002	0	1	1	0	1	1	0	2	30	0	30		5	0	5		2	1	1		5	4		5	4		29	5	24	1	1	15	6	2	2	0		0	0	0		1	2	1
0	3	6	1.022	6	1.022	0	0	0	0	0	1	1	1	28	0	28		3	0	3		4	0	4		6	4		4	3		18	2	16	2	0	14	6	2	2	0		0	0	0		1	2	1
1	2	4	1.016	1	1.003	0	1	1	1	1	1	1	2	21	0	21		1	1	0		0	2	-2		3	3		4	3		11	0	11	1	1	10	3	0	0	0		0	0	0		0	0	1
0	2	6	1.02	4	1.021	0	0	0	0	0	1	1	1	18	1	17		1	1	0		4	1	3		5	4		2	3		13	2	11	2	1	10	3	0	0	0		0	0	0		0	0	1
1	3	2	1.007	1	1	0	1	1	1	1	1	0	2	27	0	27		1	0	1		2	0	2		7	5		4	3		22	2	20	1	1	15	5	2	2	0		0	0	0		1	2	3
0	3	4	1.023	6	1.026	0	1	1	0	0	1	1	1	29	0	29		3	1	2		2	0	2		6	4		5	4		29	4	25	2	1	11	5	2	2	0		0	0	0		0	2	1
1	3	3	1.014	1	1	0	1	1	1	1	1	0	2	34	0	34		2	0	2		3	1	2		7	5		5	5		13	0	13	1	1	12	5	2	2	0		0	0	0		1	2	1
0	3	4	1.02	1	1.003	0	1	1	0	1	1	1	1	11	0	11		2	0	2		2	3	-1		7	5		4	3		29	3	26	2	1	12	5	2	2	0		0	0	0		1	2	1
0	3	6	1.021	6	1.03	0	0	0	0	0	1	1	2	23	0	23		2	0	2		3	0	3		5	4		5	4		10	1	9	2	1	13	4	2	2	0		0	0	0		0	0	1
1	3	4	1.026	6	1.026	0	1	1	0	0	1	1	1	23	0	23		1	0	1		1	0	1		6	4		3	3		12	1	11	1	0	10	3	2	2	1	1	1	0	0		1	2	1
1	2	6	1.018			0	0		1		1																								1		12	3	0	0	0		0	0	0		0	1	1
0	2	2	1.007	4	1.016	0	1	1	1	1	1	1	1	16	0	16		1	0	1		1	1	0		4	3				1	12	0	12	2	1	13	3	0	0	0		0	0	0		0	0	1
1	2	1	1.002	1	1.003	0	1	1	1	1	0	1	2	10	0	10		1	0	1		1	2	-1		4	3		2	2		29	2	27	1	1	10	3	0	0	0		0	0	0		0	1	1
0	2	1	1.005	2	1.017	0	1	1	1	1	1	1	1	9	0	9		2	1	1		1	2	-1		6	4		3	3		9	1	8	2	1	10	3	0	0	1	1	1	0	0		0	0	1
1	2	4	1.022	1	1	0	1	1	0	1	1	0	2	13	0	13		2	1	1		1	2	-1		4	4				1	14	1	13	1	0	10	3	0	0	0		0	0	0		0	1	1
0	2	6	1.02	1	1	0	0	0	0	1	1	0	1	13	0	13		2	0	2		2	0	2		5	4		2	2		13	1	12	2	1	15	5	0	2	0		0	0	0		0	0	1
1	2	2	1.006			0	1	1	1		1																								1	1	12	5	0	0	0		0	0	0		0	0	1
1	3	4	1.019	1	1	0	1	1	1	1	1	0	1	21	0	21		4	1	3		5	0	5		7	5		3	3		29	5	24	1	0	13	5	2	2	0		0	0	0		0	2	1
0	3	3	1.018	4	1.02	0	1	1	1	0	1	1	2	29	0	29		2	0	2		5	0	5		6	6		4	4		29	2	27	2	0	13	5	2	2	0		0	0	0		1	2	1
0	3	4	1.024	6	1.024	0	1	1	0	0	1	1	2	26	0	26		2	0	2		4	0	4		4	3		5	4		17	1	16	2	0	12	5	2	2	0		0	0	0		1	2	1
1	3	7	1.021	1	1.001	0	0	0	0	1	1	0	1	30	0	30		2	0	2		2	0	2		6	4		4	3		29	6	23	1	0	13	5	2	2	0		0	0	0		0	1	1
1	2	3.5	1.017	1	1.001	0	1	1	1	1	1	0	2	9	0	9		1	0	1		0	3	-3		6	4		2	3		19	0	19	1	0	12	5	0	0	0		0	0	0		1	1	1
1	3	4	1.02	1	1	0	1	1	0	1	1	0																							1	1	12	5	2	2	0		0	0	0		0	2	1
0	2	1	1.01	4	1.02	0	1	1	1	0	1	1	2				1	2	0	2		0	2	-2		6	4				1	23	1	22	2	1	13	5	0	0	0		0	0	0		0	0	1
1	2	2	1.009	1	1	0	1	1	1	1	1	0	1	12	0	12		4	1	3		2	1	1		5	4		3	3		29	2	27	1	1	12	5	0	1	0		0	0	0		0	0	1
0	3	7	1.014	6.5	1.008	0	0	0	1	1	1	1	2	25	0	25		3	0	3		2	0	2		4	3		2	2		29	4	25	2	0	12	5	2	2	0		0	0	0		0	2	1
1	3	1	1.009	1	1	0	1	1	1	1	1	0	1	23	0	23		1	1	0		3	0	3		6	4		2	2		29	9	20	1	1	14	5	2	2	1	1	1	0	0		0	1	1
0	2	4	1.021	2	1.015	0	1	1	0	1	1	1	2	19	0	19		5	0	5		1	0	1		6	5		3	3		16	0	16	2	0	14	5	0	0	0		0	0	0		0	0	1
1	2	2	1.014	1	1	0	1	1	1	1	1	0	1	23	0	23		4	0	4		2	1	1		7	5		5	4		5	0	5	1	1	13	5	0	0	0		0	0	0		0	0	1
0	2	6	1.023	4	1.027	0	0	0	0	0	1	1	2	33	0	33		0	0	0		1	0	1		6	4		6	5		29	1	28	2	0	13	5	0	0	0		0	0	0		0	0	1
1	2	4	1.016	1	1.002	0	1	1	1	1	1	0	1	11	0	11		4	9	-5		2	2	0		7	5		4	4		11	0	11	1	0	13	5	0	1	0		0	0	0		0	1	1
0	2	4	1.024	7	1.029	0	1	1	0	0	1	1	2	16	0	16		0	0	0		0	3	-3		8	5		3	3		10	0	10	2	1	12	5	0	0	0		0	0	0		0	0	1
1	2	4	1.015	1	1	0	1	1	1	1	1	0	1	23	0	23		0	0	0					1	6	4		2	2		10	0	10	1	0	15	5	0	0	1	1	1	0	0		0	1	1
1	2	4	1.021	2	1.007	0	1	1	0	1	1	1	2	25	0	25		3	0	3		3	2	1		5	4		3	3		29	3	26	1	1	13	5	0	0	0		0	0	0		1	1	1
0	2	4	1.028	6	1.029	0	1	1	0	0	1	1	1	19	0	19		5	0	5		5	0	5		4	3		4	3		16	1	15	2	0	13	5	1	1	0		0	0	0		1	1	1
1	2	3	1.018	1	1	0	1	1	1	1	1	0	2	13	0	13					1	3	1	2		6	4		4	3		17	0	17	1	0	14	5	0	0	0		0	0	0		0	1	1
0	2	1	1.006	3	1.011	0	1	1	1	1	1	1	1	31	0	31		4	0	4		4	0	4		5	4		6	4		29	6	23	2	0	15	5	0	0	0		0	0	0		0	1	1
0	2	2.5	1.009	3	1.01	0	1	1	1	1	1	1	2	25	0	25		2	0	2		3	1	2		6	6		6	4		26	6	20	2	1	14	5	0	0	0		0	0	0		0	0	1
1	2	2	1.007	1	1	0	1	1	1	1	1	0	1	14	0	14		5	0	5		5	0	5		7	5		6	4		8	0	8	1	1	12	5	0	0	0		0	0	0		0	0	1
1	2	4	1.022	1	1.001	0	1	1	0	1	1	0	2	32	0	32		3	0	3		2	1	1		5	4		5	4		9	0	9	1	1	17	5	0	0	0		0	0	0		0	0	1
0	2	2	1.012	4	1.017	0	1	1	1	1	1	1	1	21	0	21		2	0	2		3	0	3		5	4		5	4		6	0	6	2	1	14	5	0	0	0		0	0	0		0	1	1
0	2	6	1.022	6	1.025	0	0	0	0	0	1	1	2	27	0	27		4	0	4		2	2	0		5	4		3	3		11	1	10	2	1	12	5	0	0	0		0	0	0		0	0	1
1	2	4	1.021	1	1	0	1	1	0	1	1	0	1	38	0	38		4	0	4		5	0	5		7	6		4	3		0	0	0	1	1	14	5	0	0	0		0	0	0		1	1	1
0	2	2	1.007	4	1.018	0	1	1	1	1	1	1	2	31	0	31					1	4	0	4		5	4		6	4		29	0	29	2	1	15	5	0	0	0		0	0	0		0	0	1
1	2	5	1.02	1	1.002	0	1	1	0	1	1	0	1	23	0	23		2	2	0		3	0	3		5	4		4	4		14	0	14	1	1	14	5	0	0	0		0	0	0		0	1	1
0	2	4	1.017	1	1.001	0	1	1	1	1	1	0	2	33	0	33		1	1	0		1	1	0		5	4		4	3		9	0	9	2	0	15	5	0	0	0		0	0	0		0	0	1
1	2	4	1.019	3	1.014	0	1	1	1	1	1	1	1	28	0	28		4	2	2		3	0	3		4	3		4	4		29	2	27	1	1	13	5	0	0	1	1	1	0	0		0	1	1
0	2	2.5	1.013	2	1.021	0	1	1	1	0	1	1	2	22	0	22		2	1	1		1	0	1		4	3		1	2		21	3	18	2	1	14	5	0	0	0		0	0	0		0	0	1
1	2	6	1.024	4	1.022	0	0	0	0	0	1	1	1	12	0	12		1	2	-1		1	1	0		6	5		4	3		8	0	8	1	0	13	5	0	0	0		0	0	0		0	1	1
0	2	4	1.019	6	1.028	0	1	1	1	0	1	1	2	15	0	15		3	1	2		1	3	-2		3	3		3	3		8	3	5	2	1	12	5	0	0	0		0	0	0		0	0	1
1	2	6	1.021	1	1.001	0	0	0	0	1	1	0	1	27	0	27		1	0	1		2	0	2		5	4				1	19	0	19	1	1	10	3	0	0	0		0	0	0		1	1	1
0	2	4	1.016	4	1.025	0	1	1	1	0	1	1	2	16	0	16		1	0	1		0	1	-1		5	4		3	3		12	1	11	2	1	12	3	0	0	1	1	1	0	0		1	0	1
1	2	2	1.007	1	1	0	1	1	1	1	1	0	2	16	0	16		2	0	2		3	0	3		6	4		1	2		24	0	24	1	1	10	3	0	1	0		0	0	0		0	1	1
1	2	4	1.023	1	1.002	0	1	1	0	1	1	0	2	24	0	24		2	0	2		2	0	2		7	5		3	3		18	2	16	1	0	15	4	0	1	0		0	0	0		0	1	1
0	2	6	1.011	6	1.023	0	0	0	1	0	1	1	1	16	0	16		1	1	0		2	1	1		5	4		3	3		16	2	14	2	0	14	4	0	1	1	1	1	0	0		0	1	1
1	2	2	1.008	1	1.002	0	1	1	1	1	1	0	2	14	0	14		1	0	1		0	1	-1		6	4		3	3		14	2	12	1	1	10	4	0	1	0		0	0	0		0	1	1
0	2	4.5	1.017	1	1.003	0	1	1	1	1	1	1	1	27	0	27		3	0	3		1	0	1		6	4		4	3		28	3	25	2	1	13	4	0	0	1	1	1	0	0		0	0	1
1	2	2	1.019	1	1.002	0	1	1	1	1	1	0	2	14	1	13		3	0	3		3	0	3		4	3		3	3		29	9	20	1	0	13	4		0	0		0	0	0		0	1	1
0	2	6	1.018	6	1.022	0	0	0	1	0	1	1	1	28	0	28		1	0	1		2	1	1		6	4		2	2		17	5	12	2	1	12	4	1	1	1	1	1	0	0		0	0	1
1	2	6	1.025	2	1.006	0	0	0	0	1	1	1	2	19	0	19		3	0	3		2	0	2		5	4		2	2		29	3	26	1	0	13	4	0	0	0		0	0	0		0	0	1
0	2	5	1.018	1	1	0	1	1	1	1	1	0	1	15	0	15		1	2	-1		1	0	1		6	4		4	3		11	0	11	2	1	11	4	0	1	0		0	0	0		0	1	1
1	2	3	1.022	1	1	0	1	1	0	1	1	0	2	21	0	21		1	0	1		1	0	1		6	4		3	3		29	4	25	1	1	10	4	0	0	0		0	0	0		0	1	1
0	2	2	1.007	4	1.022	0	1	1	1	0	1	1	1	23	0	23		2	1	1		3	1	2		5	4				1	16	4	12	2	0	13	4	0	1	1	1	1	0	0		1		1
1	2	1	1.006	1	1	0	1	1	1	1	1	0	2	31	0	31		3	1	2		1	2	-1		5	4		3	3		8	1	7	1	0	13	4	0	0	0		0	0	0		0	0	1
0	2	4	1.015	5	1.022	0	1	1	1	0	1	1	1	23	0	23		1	2	-1					1	5	4		4	3		12	3	9	2	0	13	4	0	0	1	1	1	0	0		1	1	1
1	2	2	1.011	1	1.001	0	1	1	1	1	1	0	2	20	0	20		1	0	1		2	1	1		6	4		3	3		9	4	5	1	1	13	4	0	0	1	1	1	0	0		0	0	1
0	2	4	1.008	4	1.023	0	1	1	1	0	1	1	1	18	0	18		1	0	1		3	0	3		6	4		3	3		12	4	8	2	0	12	4	0	0			0	0	0		0	1	1
1	2	3	1.016	1	1	0	1	1	1	1	1	0	2	13	0	13		0	0	0		1	0	1		3	3		2	2		22	5	17	1	1	13	4	0	0	0		0	0	0		1	1	1
0	2	4	1.026			0	1	1	0		1		1	13	0	13		2	1	1		2	2	0		6	4		3	3		10	3	7	2	1	11	4	0	0	0		0	0	0		0	0	1
1	2	3.5	1.019	1	1	0	1	1	1	1	1	0	2	17	0	17		2	0	2		2	0	2		6	4		2	2		29	8	21	1	1	13	4	0	0	0		0	0	0		0	0	1
0	2	3	1.014	4	1.018	0	1	1	1	1	1	1	1	26	0	26		2	1	1		4	2	2		6	4				1	12	6	6	2	1	15	6	0	0	0		0	0	0		0	0	1
1	2	3	1.015	1	1.001	0	1	1	1	1	1	0	2	32	0	32		2	0	2		4	1	3		8	5		4	3		22	7	15	1	1	14	6	0	0	0		0	0	0		1	1	1
0	2	3	1.017	6	1.024	0	1	1	1	0	1	1	1	34	0	34		3	3	0		2	2	0		6	4		5	4		20	4	16	2		15	6	0	0	0		0	0	0		0	1	2
1	2	3	1.021	1	1	0	1	1	0	1	1	0	2	21	0	21		5	0	5		2	1	1		7	5		5	4		9	1	8	1	1	15	6	0	0	0		0	0	0		0	0	1
0	2	3	1.011			0	1	1	1		1		1	26	0	26		4	0	4		2	1	1		6	4		2	2		12	1	11	2	1	18	6	0	0	0		0	0	0		1	1	1
1	2	1	1.004	8	1.025	1	1	1	1	0	1	1	2	20	0	20		3	0	3		4	0	4		6	4		3	3		29	7	22	1	0	15	6	0	0	0		0	0	0		0	0	1
0	2	4	1.019	1	1	0	1	1	1	1	1	0	1	34	0	34					1	4	3	1		8	5		5	4		29	8	21	2	0	15	6	0	0	0		0	0	0		0	0	1
1	2	2	1.009	1	1.003	0	1	1	1	1	1	1	2	23	0	23		3	0	3		2	1	1		7	5		6	5		29	7	22	1	1	14	6	0	0	1	1	1	0	0		1	1	1
0	2	2	1.01	5	1.016	0	1	1	1	1	1	1	1	27	0	27					1	4	0	4		6	4		4	3		5	0	5	2	1	13	6	0	0	1	1	1	0	0		0	0	1
1	2	3	1.018	1	1.001	0	1	1	1	1	1	0	2	20	0	20		2	0	2		3	1	2		6	4		5	4		29	8	21	1	1	13	6	0	0	0		0	0	0		0	0	1
0	2	3	1.016	3	1.02	0	1	1	1	0	1	1	1	16	0	16		2	1	1		2	1	1		5	4		1	3		22	3	19	2	1	15	6	0	0	0		0	0	0		0	0	1
1	2	6	1.022	6	1.025	0	0	0	0	0	1	1	2	27	0	27		3	1	2		2	1	1		6	4		5	4		26	6	20	1	1	15	6	0	0	0		0	0	0		0	0	1
0	2	4	1.016	6	1.017	0	1	1	1	1	1	1	1	36	0	36		2	0	2		5	0	5		6	4		3	3		28	7	21	2	1	15	6	0	0	0		0	0	0		0	0	1
1	2	6	1.023	4	1.018	0	0	0	0	1	1	1	2	34	0	34		4	1	3		6	0	6		7	5		4	3		29	5	24	1	1	15	6	0	0	0		0	0	0		0	0	1
0	2	5	1.014	7	1.027	0	1	1	1	0	1	1	1	35	0	35		3	0	3		2	0	2		6	4		6	4		29	4	25	2	1	15	6	0	0	0		0	0	0		0	1	1
1	2	1.5	1.006	1	1.002	0	1	1	1	1	1	0	2	28	0	28		4	0	4		1	1	0		7	5		6	4		29	1	28	1	1	12	6	0	0	0		0	0	0		0	0	1
0	2	7	1.022	6	1.028	0	0	0	0	0	1	1	1	27	0	27					1	3	0	3		6	4		6	4		22	3	19	2	1	14	6	0	0	0		0	0	0		0	1	1
1	2	3	1.015	2	1.003	0	1	1	1	1	1	1	2	29	0	29		4	0	4		4	0	4		7	5		6	4		29	3	26	1	1	12	6	0	0	1	1	1	0	0		1	1	1
0	2	6	1.025	7	1.031	0	0	0	0	0	1	1	1	28	0	28		4	0	4		6	2	4		6	4		4	5		11	0	11	2	0	15	6	0	0	0		0	0	0		0	1	1
1	2	6	1.023	1	1.001	0	0	0	0	1	1	0	2	29	0	29		4	0	4		0	3	-3		6	4		5	4		15	1	14	1	0	15	6	0	0	0		0	0	0		1	1	1
0	2	4	1.019	6	1.031	0	1	1	1	0	1	1	1	29	0	29		2	1	1		3	1	2		6	4		7	5		12	2	10	2	1	15	6	0	0	0		0	0	0		0	1	1
1	2	2	1.014	1	1.001	0	1	1	1	1	1	0	2	36	0	36		3	0	3		4	1	3		7	5		6	4		29	10	19	1	0	16	6	0	0	1	1	1	0	0		1	1	1
0	2	6	1.021			0	0		0		1		1	30	0	30		2	0	2		1	1	0		6	4		4	3		29	8	21	2	1	13	6	0	0	1	1	1	0	0		0	0	1
1	2	2	1.009	1	1.001	0	1	1	1	1	1	0	2	30	0	30		2	0	2		4	0	4		5	4		2	2		13	2	11	1	0	17	6	0	0	0		0	0	0		1	1	1
0	2	3	1.017	4	1.022	0	1	1	1	0	1	1	1	16	0	16					1	2	1	1		4	3		2	2		17	2	15	2	1	13	6	0	0	1	1	1	0	0		1	1	1
1	2	7	1.022	5	1.013	0	0	0	0	1	1	1	2	14	0	14		3	0	3		3	0	3		6	4		4	3		29	5	24	1	1	16	6	0	0	1	1	1	0	0		0	1	1
1	2	6	1.018	2	1.005	1	0	0	1	1	1	1	1	23	0	23					1				1	4	3		2	2		22	0	22	1	0	14	5	0	0	0		0	0	0		0	1	1
1	1	4	1.016	1	1.006	0	1	1	1	1	1	1	2	18	0	18		1	1	0		2	0	2		3	3				1	11	1	10	1	1	14	5	2	2	0		0	0	0		1	1	1
0	1	6	1.025	6	1.031	0	0	0	0	0	1	1	1	16	0	16		3	1	2		2	2	0		7	5		6	4		13	1	12	2	0	12	5	2	2	0		0	0	0		0	1	1
1	1	6	1.023	2	1.01	0	0	0	0	1	1	1	2	15	0	15		2	0	2		1	1	0		5	4		4	3		29	10	19	1	1	13	5	2	2	0		0	0	0		0	0	1
0	1	4	1.02	6	1.025	0	1	1	0	0	1	1	1	19	0	19		6	0	6		6	1	5		5	4		4	3		24	2	22	2	1	13	6	2	2	0		0	0	0		0	0	1
1	1	2	1.007	1	1.003	0	1	1	1	1	1	1	2	18	0	18		5	0	5		3	2	1		6	4		3	3		29	5	24	1	1	12	6	2	2	1	1	1	0	0		1	1	1
0	1	4	1.02	6	1.026	0	1	1	0	0	1	1	1	17	1	16		2	1	1		2	1	1		7	6		5	4		10	1	9	2	0	17	6	2	2	0		0	0	0		0	1	1
1	1	5	1.018	4	1.02	0	1	1	1	0	1	1	2	25	0	25		4	0	4		5	2	3		6	5		5	4		16	1	15	1	1	15	6	2	2	1	2	0	1	0		1	1	1
0	1	3	1.008	6	1.021	0	1	1	1	0	1	1	1	26	0	26		5	0	5		7	0	7		7	6		7	5		23	2	21	2	0	15	6	2	2	1	1	1	0	0		1	1	1
1	1	6.5	1.032	3	1.029	0	0	0	0	0	1	1	2	33	0	33		3	0	3		7	3	4		6	4		4	3		29	4	25	1	1	13	6	2	2	0		0	0	0		0	1	1
0	1	7	1.029	7	1.033	1	0	0	0	0	1	1	1	24	0	24		3	0	3		3	0	3		6	4		4	3		21	3	18	2	1	12	6	2	2	0		0	0	0		0	1	1
1	1	5	1.025	6	1.023	0	1	1	0	0	1	1	2	13	0	13		3	0	3		3	1	2		5	4		6	4		29	4	25	1	0	13	6	2	2	0		0	0	0		0	1	1
0	1	4	1.022	6	1.03	0	1	1	0	0	1	1	1	11	0	11		1	0	1		4	1	3		5	4		3	3		21	4	17	2	0	13	6	2	2	0		0	0	0		0	1	1
1	1	7	1.029	7	1.025	0	0	0	0	0	1	1	2				1	3	0	3		1	2	-1		6	4		2	2		18	0	18	1	1	14	5	2	2	0		0	0	0		0	0	1
0	1			6	1.027	0		0		0		1	1	21	0	21		4	0	4		5	1	4		7	5		6	5		29	4	25	2	0	13	5	2	2	0		0	0	0		1	1	1
1	1	4.5	1.02	6	1.031	0	1	1	0	0	1	1	2	24	0	24		3	0	3		2	2	0		5	4		4	3		28	4	24	1	1	15	6	2	2	1	1	1	0	0		0	2	1
0	1	4	1.019	7	1.031	0	1	1	1	0	1	1	1	14	0	14		5	0	5		5	0	5		6	4		3	3		17	0	17	2	1	12	5	2	2	0		0	0	0		0	1	1
1	1	6	1.028	3	1.016	0	0	0	0	1	1	1	2	17	0	17		6	1	5		2	3	-1		6	4		2	3		18	2	16	1	0	15	5	2	2	0		0	0	0		0	1	1
0	1	6	1.023	7	1.033	0	0	0	0	0	1	1	1	23	0	23		0	1	-1		0	1	-1		5	4		2	2		21	3	18	2	1	13	5	2	2	0		0	0	0		0	1	1
1	1	6	1.026	7	1.035	0	0	0	0	0	1	1	2	19	0	19		2	0	2		4	1	3		5	4		3	3		10	1	9	1	1	13	5	2	2	0		0	0	0		1	1	1
0	1	4	1.015	6	1.03	0	1	1	1	0	1	1	1	11	0	11		4	0	4		1	0	1		6	4		2	2		10	1	9	2	1	11	5	2	2	0		0	0	0		1	1	1
1	1	6	1.022	6	1.019	0	0	0	0	1	1	1	2	19	0	19		6	0	6		3	3	0		7	5		5	4		24	1	23	1	0	11	5	2	2	0		0	0	0		0	1	1
0	1	6	1.026	7	1.029	1	0	0	0	0	1	1	1	16	0	16		5	0	5		4	0	4		6	4		6	4		14	1	13	2	0	14	5	2	2	0		0	0	0		0	0	1
1	1	4	1.015	1	1.006	0	1	1	1	1	1	1	2	17	0	17		3	0	3		2	2	0		6	4		4	3		14	2	12	1	0	14	5	2	2	0		0	0	0		0	1	1
0	1	5	1.019	6	1.024	0	1	1	1	0	1	1	1	28	0	28		4	2	2		3	0	3		6	4		3	3		19	2	17	2	0	13	5	2	2	0		0	0	0		0	1	1
1	1	3	1.011	4	1.013	0	1	1	1	1	1	1	2	31	0	31		4	0	4		2	2	0		6	4		2	2		21	3	18	1	0	14	5	2	2	1	1	1	0	0		1	1	1
0	1	3	1.01	7	1.032	0	1	1	1	0	1	1	1	7	0	7		3	0	3		4	1	3		6	4		2	2		20	3	17	2	0	11	5	2	2	0		0	0	0		0	0	1
1	1	4	1.016	6	1.032	0	1	1	1	0	1	1	2	18	0	18		4	0	4		1	1	0		6	4		4	3		24	2	22	1	0	15	6	2	2	0		0	0	0		1	1	1
1	1	3	1.012	1	1.003	0	1	1	1	1	1	1	2	7	0	7		3	0	3		3	5	-2		4	4		2	2		29	1	28	1	1	11	3	1	0	1	1	1	0	0		0	1	1
0	1	4	1.018	7	1.029	0	1	1	1	0	1	1	1	18	3	15					1				1	5	4				1	29	2	27	2	0	9	3	2	2	0		0	0	0		0	2	1
1	1	6.5	1.028	4	1.012	0	0	0	0	1	1	1	2	10	0	10		3	0	3		2	0	2		5	4		3	3		15	1	14	1	0	9	3	1	1	1	1	1	0	0		0	1	1
0	1	3.5	1.018	4	1.021	0	1	1	1	0	1	1	1	9	0	9		2	0	2		3	1	2		6	4		3	3		12	2	10	2	0	9	3	2	2	1	1	1	0	0		1	2	1
1	1	5	1.018	1	1.005	0	1	1	1	1	1	1	2	14	0	14					1				1	7	5		4	3		24	4	20	1	0	11	3	1	1	1	1	1	0	0		1	1	1
0	1	6	1.022	6	1.027	0	0	0	0	0	1	1	1	18	0	18		2	0	2		3	0	3		4	4		2	2		17	3	14	2	1	10	3	2	2	1	2	0	1	0		1	2	1
1	1	3	1.013	4	1.018	0	1	1	1	1	1	1	2	24	0	24		2	0	2		2	0	2		1	2		2	3		6	1	5	1	1	11	3	1	1	1	1	1	0	0		0	1	1
0	1	4	1.014	4	1.028	0	1	1	1	0	1	1	1	28	0	28		0	1	-1		2	0	2		5	4				1	21	3	18	2	1	13	3	2	1	1	1	1	0	0		0	1	1
1	1	3.5	1.017	8	1.028	1	1	1	1	0	1	1	2	12	0	12		1	0	1		2	0	2		6	4		3	3		22	4	18	1	0	11	3	1	1	1	1	1	0	0		0	1	1
0	1	4	1.018	1	1.006	0	1	1	1	1	1	1	1	6	0	6		1	1	0		3	0	3		7	5				1	16	2	14	2	0	13	3	2	2	0		0	0	0		0	2	1
0	1	6	1.018	7	1.029	0	0	0	1	0	1	1	2	15	0	15					1				1	6	4		0	0		27	4	23	2	0	12	3	0	1	0		0	0	0		1	2	1
1	1	6	1.024	1	1.004	0	0	0	0	1	1	1	1	22	0	22					1				1	6	4		3	3		29	6	23	1	0	12	4	1	1	0		0	0	0		0	1	1
0	1	3	1.017	4	1.023	0	1	1	1	0	1	1	2	4	0	4		3	0	3		1	0	1		8	5				1	29	3	26	2	0	10	3	1	1	0		0	0	0		0	2	1
1	1	5	1.021	3	1.019	0	1	1	0	1	1	1	1	19	0	19		2	0	2		3	2	1		4	3		2	2		9	1	8	1	1	11	3	1	1	1	1	1	0	0		1	1	1
1	1	5	1.023	3	1.011	0	1	1	0	1	1	1	2	27	0	27		2	0	2		4	1	3		6	4		2	2		19	2	17	1	1	13	3	1	1	1		0	0	0		1	1	1
1	1	4	1.017	1	1.006	0	1	1	1	1	1	1	1	7	0	7		1	0	1		1	0	1		6	4		4	3		9	0	9	1	1	13	3	1	1	0		0	0	0		1	1	1
0	1	5	1.026	6	1.029	0	1	1	0	0	1	1	2	14	0	14		2	0	2		5	0	5		6	4		3	3		29	2	27	2	0	12	4	1	1	1	1	1	0	0		0	2	1
1	1	4	1.015	4	1.014	0	1	1	1	1	1	1	1	21	0	21		2	0	2		4	3	1		6	4		4	3		15	1	14	1	1	10	4	1	1	1	1	1	0	0		1	1	1
0	1	4	1.021	4	1.026	0	1	1	0	0	1	1	2	26	0	26		3	0	3		4	0	4		6	4		5	4		29	2	27	2	0	15	4	2	1	1	1	1	0	0		0	1	1
1	1	4	1.015	2	1.006	0	1	1	1	1	1	1	1	16	0	16		1	0	1		4	0	4		3	3		2	2		17	0	17	1	0	12	4	1	1	0		0	0	0		0	1	1
0	1	6	1.025	7	1.031	0	0	0	0	0	1	1	2	17	0	17		3	0	3		5	0	5		6	4		3	3		29	3	26	2	0	13	4	2	2	0		0	0	0		0	2	1
1	1	3.5	1.017	4	1.026	0	1	1	1	0	1	1	1	21	0	21		6	3	3		5	1	4		8	5		6	5		29	3	26	1	0	14	4	1	1	0		0	0	0		1	1	1
0	1	6	1.027	6	1.029	0	0	0	0	0	1	1	2	7	0	7		4	1	3		2	3	-1		5	4		2	2		9	2	7	2	0	12	4	2	2	0		0	0	0		0	2	1
1	1	3	1.014	2	1.008	0	1	1	1	1	1	1	1	26	0	26		4	0	4		2	0	2		4	3		2	2		28	4	24	1	0	13	4	1	1	0		0	0	0		0	0	1
0	1	3	1.012	6	1.019	0	1	1	1	1	1	1	2	14	0	14		2	0	2		1	1	0		5	4		4	3		11	2	9	2	1	12	4	2	2	1	1	1	0	0		1	2	1
1	1	5	1.023	3	1.01	0	1	1	0	1	1	1	1	10	0	10		5	0	5		5	1	4		5	4				1	12	1	11	1	0		4	1	1	0		0	0	0		0	1	1
0	1	5	1.021	6	1.03	0	1	1	0	0	1	1	2	12	0	12		1	0	1		1	0	1		5	4		4	3		16	1	15	2	1	13	4	1	1	1	1	1	0	0		0	2	1
1	1	5	1.023	2	1.014	0	1	1	0	1	1	1	1	14	0	14		3	0	3		5	1	4		6	4		5	4		16	1	15	1	1	13	4	1	1	1	2	0	1	0		1		1
0	1	4	1.019	4	1.015	0	1	1	1	1	1	1	2	25	0	25		3	0	3		2	1	1		6	4		4	3		27	3	24	2	0	12	4	1	1	1	88	0	0	0	millet porridge (tobwa)	1	2	1
1	1	7	1.031	1	1.004	0	0	0	0	1	1	1	1	13	0	13		0	0	0		0	1	-1		3	3		2	2		24	5	19	1	1	10	4	1	1	1	1	1	0	0		0	1	1
0	1	6	1.024	6	1.03	0	0	0	0	0	1	1	2	25	0	25		6	2	4		2	1	1		5	4		4	3		23	5	18	2	0	11	4	2	2	0		0	0	0		1	2	1
1	1	3	1.012	6	1.024	1	1	1	1	0	1	1	1	12	0	12					1				1	6	4		1	2		29	8	21	1	1	11	4	1	1	0		0	0	0		1		1
0	1	5	1.022	4	1.028	0	1	1	0	0	1	1	1	18	0	18		4	1	3		2	3	-1		7	5		4	3		24	1	23	2	1	13	4	1	1	0		0	0	0		1	2	1
1	1	5	1.021	2	1.01	0	1	1	0	1	1	1	2	26	0	26		1	0	1		3	0	3		6	4		5	4		21	4	17	1	1	14	4	1	1	0		0	0	0		0	1	1
0	5	2	1.013	4	1.021	0	1	1	1	0	1	1	1	28	0	28		2	0	2		5	0	5		6	4		3	3		21	1	20	2	1	12	5	1	2	0		0	0	0		1	1	1
1	5	4	1.01	1	1.002	0	1	1	1	1	1	0	1	31	0	31		2	1	1		4	0	4		5	4		5	4		23	1	22	1	1	12	5	1	1	0		0	0	0		0	2	1
1	5	2	1.007	1	1.002	0	1	1	1	1	1	0	2	11	0	11		4	0	4		3	0	3		3	3		5	4		29	3	26	1	0	11	4	1	1	0		0	0	0		1	1	1
0	5	3	1.014	3	1.013	0	1	1	1	1	1	1	2	29	0	29		2	0	2		2	1	1		6	4		4	3		29	1	28	2	0	13	5	2	2	1	1	1	0	0		1	0	1
1	5	3	1.017	1	1.001	0	1	1	1	1	1	0	1	12	0	12		4	1	3		4	2	2		4	3		4	3		21	1	20	1	0	12	5	1	1	0		0	0	0		1	1	1
0	5	2	1.012	4	1.018	0	1	1	1	1	1	1	1	20	0	20		1	0	1		1	2	-1		4	3				1	28	1	27	2	0	13	5	1	1	0		0	0	0		0	1	1
1	5	6	1.018	1	1.001	0	0	0	1	1	1	0	2	19	0	19		1	0	1		3	1	2		6	5		4	3		29	1	28	1	0	13	5	1	1	1	1	1	0	0		1	0	1
0	5	6	1.028	6	1.029	0	0	0	0	0	1	1	2	15	0	15		2	0	2		1	0	1		4	3		4	3		29	1	28	2	0	13	5	1	1	1	1	1	0	0		0	1	1
1	5	4.5	1.019	2	1.005	0	1	1	1	1	1	1	1	14	0	14		1	0	1		7	0	7		6	4		5	5		29	2	27	1	0	11	5	2	2	0		0	0	0		0	1	1
0	5	3	1.015	4	1.021	0	1	1	1	0	1	1	1	14	0	14		2	0	2		3	0	3		7	5		4	3		29	1	28	2	0	13	5	2	2	0		0	0	0		1	1	1
1	5	3	1.015	1	1.002	0	1	1	1	1	1	0	2	28	0	28		3	0	3		2	1	1		5	4		5	4		29	3	26	1	0	12	5	2	2	1	1	1	0	0		1	1	1
1	5	4	1.021	1	1.002	0	1	1	0	1	1	0	2	28	0	28		3	0	3		2	0	2		8	5		6	4		29	2	27	1	0	14	5	2	2	0		0	0	0		0	1	1
0	5	3	1.015	3	1.015	0	1	1	1	1	1	1	1	23	0	23		4	0	4		4	0	4		5	4		5	4		29	1	28	2	0	14	6	2	2	0		0	0	0		0	0	2
1	5	3	1.022	1	1.001	0	1	1	0	1	1	0	1	26	0	26		2	0	2		2	2	0		1	2				1	29	1	28	1	0	13	6	2	2	0		0	0	0		1	0	1
0	5	3	1.013	6	1.025	0	1	1	1	0	1	1	2	20	0	20		1	0	1		3	2	1		7	5		6	5		29	0	29	2	1	13	6	2	2	1	2	0	1	0		1	2	1
1	5	4	1.018	1	1.003	0	1	1	1	1	1	1	2	29	0	29		4	0	4		2	0	2		6	5		4	3		29	2	27	1	1	13	6	2	2	0		0	0	0		1	1	1
0	5	4.5	1.027	6	1.032	0	1	1	0	0	1	1	1	26	0	26		2	0	2		3	2	1		6	4		5	4		29	4	25	2	0	13	6	2	2	0		0	0	0		0	2	1
1	5	4	1.014	1	1.003	0	1	1	1	1	1	1	1	12	0	12		0	1	-1		2	1	1		4	4		1	2		15	0	15	1	0	13	6	2	2	0		0	0	0		1	1	1
0	5	2	1.01	2	1.013	0	1	1	1	1	1	1	2	36	0	36		3	0	3		5	3	2		7	5		7	5		29	5	24	2	1	13	6	2	2	0		0	0	0		0	1	1
1	5	4	1.015	1	1.003	0	1	1	1	1	1	1	2	25	0	25		3	0	3		3	0	3		7	5		2	2		29	0	29	1	0	13	6	2	2	0		0	0	0		0	1	1
1	5	5	1.032	1	1.005	0	1	1	0	1	1	1	1	35	0	35		3	0	3		5	0	5		6	4		5	5		29	3	26	1	1	13	6	2	2	0		0	0	0		0	1	1
0	5	6	1.025			0	0		0		1																								2	0	14	6	2	2	0		0	0	0		0	1	1
1	5	2	1.014	1	1.003	0	1	1	1	1	1	1	2	37	0	37		3	0	3		1	2	-1		5	6		3	3		29	1	28	1	1	14	6	2	2	0		0	0	0		0	1	1
0	5	3	1.013	6	1.018	0	1	1	1	1	1	1	2	32	0	32		1	1	0		3	2	1		7	6		4	3		29	2	27	2	1	17	6	2	2	0		0	0	0		0	2	1
0	5	1	1	6	1.031	0	1	1	1	0	0	1	1	26	0	26		2	0	2		3	0	3		8	6		5	4		18	0	18	2	1	12	6	2	2	0		0	0	0		0	1	1
1	5	4	1.019	1	1.002	0	1	1	1	1	1	0	1	18	0	18		2	0	2		2	0	2		5	4		2	2		20	1	19	1	1	13	6	2	2	0		0	0	0		0	1	1
0	5	6	1.022	6	1.028	0	0	0	0	0	1	1	2	30	0	30		2	0	2		2	0	2		6	4		6	4		29	4	25	2	1	13	6	2	2	0		0	0	0		0	2	1
1	5	6	1.023	3	1.016	0	0	0	0	1	1	1	2	29	0	29		4	0	4		2	3	-1		5	4		2	2		29	0	29	1	0	14	6	2	2	0		0	0	0		0	2	1
0	5	4	1.02	6	1.026	0	1	1	0	0	1	1	1	20	0	20		1	0	1		3	0	3		7	5		3	3		29	2	27	2	0	17	6	2	2	0		0	0	0		0	1	1
1	5	2	1.009	1	1	0	1	1	1	1	1	0	1	30	0	30		4	0	4		1	1	0		5	4		6	4		29	1	28	1	1	13	6	2	2	0		0	0	0		0	2	1
0	5	3	1.016	4	1.012	0	1	1	1	1	1	1	2	20	0	20		2	0	2		2	2	0		5	4		4	3		10	0	10	2	1	14	6	2	2	1	2	0	1	0		1	2	1
1	5	4	1.02	2	1.005	0	1	1	0	1	1	1	2	17	0	17		4	0	4		2	1	1		5	4		4	3		29	0	29	1	1	12	6	2	2	0		0	0	0		1	1	1
0	5	4	1.02	3	1.022	0	1	1	0	0	1	1	1	27	0	27		7	0	7		6	1	5		6	4		5	4		24	0	24	2	0	13	6	2	2	1	1	1	0	0		1	2	1
1	5	6	1.032	2	1.004	0	0	0	0	1	1	1	1	22	1	21		3	0	3		4	0	4		6	6				1	22	0	22	1	0	13	6	2	2	0		0	0	0		0	1	1
1	4	4	1.017	1	1.002	0	1	1	1	1	1	0	2	11	0	11		3	0	3		2	0	2		8	5		4	3		23	4	19	1	1	13	5	0	1	1	1	1	0	0		1	2	1
0	4	3	1.014	2	1.01	0	1	1	1	1	1	1	2	35	0	35		1	1	0		2	1	1		5	4		6	5		23	1	22	2	0	11	5	0	0	1	2	0	1	0		1	2	1
1	4	2.5	1.01	1	1	0	1	1	1	1	1	0	1	20	0	20		2	0	2		5	1	4		7	5		8	5		29	1	28	1	0	12	5	0	0	1	2	0	1	0		1	2	1
0	4	2	1.011	2	1.016	0	1	1	1	1	1	1	1	7	0	7		0	0	0		0	0	0		5	4		3	3		29	3	26	2	1	10	5	0	0	1	1	1	0	0		0	1	1
1	5	4	1.02	3	1.015	0	1	1	0	1	1	1	2	14	0	14		2	0	2		0	1	-1		5	4		5	5		9	3	6	1	1	8	3	1	1	1	88	0	0	1	milk	1		1
0	5	4	1.015	4.5	1.033	0	1	1	1	0	1	1	2	15	0	15		1	0	1		2	0	2		3	3		2	4		12	2	10	2	0	12	3	1	1	1		0	0	0		1	1	1
1	5	7	1.022	2	1.004	0	0	0	0	1	1	1	1	15	0	15		1	0	1		2	1	1		5	4				1	29	3	26	1	1		3	1	1	0		0	0	0		0	1	1
0	5	4	1.02	6	1.028	0	1	1	0	0	1	1	1	9	0	9		1	1	0		1	2	-1		2	2				1	5	0	5	2	0	11	3	1	1	0		0	0	0		0	1	1
1	5	4	1.017	1	1	0	1	1	1	1	1	0	2	9	0	9		2	0	2		0	2	-2		3	4		3	3		11	0	11	1	1	9	3	1	1	1	1	1	0	0		1	1	1
0	5	1	1	1	1.002	0	1	1	1	1	0	0	2	19	0	19		1	0	1		1	1	0		5	4		2	2		6	0	6	2	1	11	3	1	1	1	1	1	0	0		0	1	1
1	5	3	1.016	1	1.003	0	1	1	1	1	1	1	1	9	0	9		1	0	1		2	2	0		3	3		3	3		17	1	16	1	1	11	3	1	1	1	1	1	0	0		0	1	1
0	5	6	1.022	6	1.027	0	0	0	0	0	1	1	1	15	0	15		1	0	1		2	1	1		4	4		3	3		19	4	15	2	1	10	3	1	1	0		0	0	0		1	1	1
1	5	6	1.015	2	1.005	0	0	0	1	1	1	1	2	25	0	25		3	1	2		3	3	0		3	3		3	3		29	3	26	1	0	10	3	1	1	1	2	0	1	0		1		1
0	5	6	1.021	6	1.03	0	0	0	0	0	1	1	2	8	0	8		1	0	1		1	1	0		4	4		4	3		21	3	18	2	0	9	3	1	1	0		0	0	0		0	1	1
1	5	4	1.02	1	1.005	0	1	1	0	1	1	1	1				1				1	3	2	1		4	4		5	4		19	2	17	1	0	10	3	1	1	0		0	0	0		0		1
0	5	3	1.014	6	1.023	0	1	1	1	0	1	1	1	20	0	20		2	0	2		5	0	5		7	5		4	3		29	1	28	2	0	12	4	1	1	0		0	0	0		1	1	1
1	5	2	1.016	1	1	0	1	1	1	1	1	0	2	10	0	10		0	0	0		1	0	1		4	4		4	3		11	1	10	1	1	11	3	1	1	1	2	0	1	0		1	1	1
0	5	1	1.004	3	1.018	0	1	1	1	1	1	1	2	10	0	10		0	0	0		2	0	2		4	4		4	3		16	1	15	2	1	9	3	1	1	1	2	0	1	0		1	1	1
1	5	3	1.012	1	1.002	0	1	1	1	1	1	0	1	15	0	15		0	0	0		2	1	1		3	3				1	29	2	27	1	1	10	3	1	1	1	88	0	0	0	millet porridge (tobwa)	1		1
0	5	6	1.029	4	1.032	0	0	0	0	0	1	1	1	10	0	10		1	0	1		3	0	3		5	4		4	3		9	0	9	2	1	10	4	1	1	0		0	0	0		0		1
1	5	2	1.012	1	1.003	0	1	1	1	1	1	1	2	17	0	17		2	0	2		1	1	0		3	3		5	4		20	2	18	1	0	11	4	1	1	0		0	0	0		1	1	1
0	5	2	1.011	5	1.018	0	1	1	1	1	1	1	2	16	0	16		2	0	2		1	0	1		4	4		5	4		29	3	26	2	1	10	4	1	1	1	1	1	0	0		0	1	1
1	5	3	1.014	1	1.002	0	1	1	1	1	1	0	1	7	0	7		2	0	2		3	0	3		4	4		4	4		29	5	24	1	1	10	4	1	1	0		0	0	0		0	1	1
0	5	6	1.002	2	1.01	0	0	0	1	1	0	1	1	15	0	15		4	0	4		4	1	3		6	5		4	3		12	2	10	2	0	11	4	1	1	0		0	0	0		0	1	1
1	5	2	1.008	1	1	0	1	1	1	1	1	0	2	11	0	11		2	0	2		1	0	1		3	3		2	2		29	5	24	1	1	11	4	1	1	0		0	0	0		0	1	1
0	5	3	1.015	2	1.019	0	1	1	1	1	1	1	2	11	0	11		2	0	2		3	1	2		3	3		3	3		23	4	19	2	1	10	4	1	1	1	2	0	1	0		1		1
1	5	4	1.019	1	1.002	0	1	1	1	1	1	0	1	25	0	25		3	0	3		3	1	2		5	4		5	4		29	1	28	1	1	11	4	1	1	0		0	0	0		1	1	1
0	5	4	1.016	6	1.03	0	1	1	1	0	1	1	1	19	0	19		1	0	1		1	0	1		5	4				1	29	4	25	2	0	15	4	1	1	0		0	0	0		1	1	1
0	4	6	1.023	5	1.024	0	0	0	0	0	1	1	2	18	0	18		2	0	2		2	0	2		5	4		5	4		29	1	28	2	1	14	5	0	0	0		0	0	0		0	1	1
1	4		1.023	2	1.005	1		0	0	1	1	1	2	23	0	23		0	0	0		1	1	0		6	4		4	3		28	2	26	1	1	13	5	0	0	0		0	0	0		1	1	1
0	4	6	1.024	6	1.027	0	0	0	0	0	1	1	1	16	0	16		2	0	2		4	1	3		5	4		5	4		29	0	29	2	0	13	5	0	0	1	1	1	0	0		1	2	1
1	4	3	1.015	1	1.002	0	1	1	1	1	1	0	1	18	0	18		2	1	1		1	1	0		5	4		6	4		29	0	29	1	1	14	5	0	0	1	1	1	0	0		0	1	1
0	4	1	1.004	2	1.008	0	1	1	1	1	1	1	2	17	0	17		1	0	1		2	0	2		3	3		4	4		29	2	27	2	1	13	5	0	0	1	1,2	1	1	0		1	2	1
1	4	3	1.015	1	1	0	1	1	1	1	1	0	2	31	0	31		1	0	1		3	1	2		5	4		2	2		29	2	27	1	1	14	5	0	0	0		0	0	0		1	1	1
0	4	3	1.016	4	1.02	0	1	1	1	0	1	1	1	21	0	21		2	0	2		3	1	2		6	5		4	3		29	2	27	2	1	13	5	0	0	0		0	0	0		0	1	1
1	4	2.5	1.012	1	1.002	0	1	1	1	1	1	0	1	31	0	31		3	0	3		2	3	-1		6	4		3	3		22	1	21	1	1	12	6	0	1	1	2	0	1	0		1	2	1
0	4	2	1.009	5	1.022	0	1	1	1	0	1	1	2	16	0	16		1	0	1		0	2	-2		4	4		2	2		29	1	28	2	0	13	6	0	0	1	1	1	0	0		0	2	1
1	4	6	1.025	1	1.001	0	0	0	0	1	1	0	2	23	0	23		2	0	2		3	0	3		6	4		5	5		29	5	24	1	0	15	6	0	0	0		0	0	0		1	1	1
0	4	3	1.015	3	1.019	0	1	1	1	1	1	1	1	25	0	25		3	0	3		2	0	2		6	4		6	5		29	5	24	2	1	13	6	0	0	1	1	1	0	0		1	2	1
1	4	5	1.02	2	1.01	0	1	1	0	1	1	1	1	26	0	26		0	1	-1		1	1	0		4	4		3	4		29	3	26	1	0	16	6	0	0	0		0	0	0			2	1
0	4	5	1.026	4	1.024	0	1	1	0	0	1	1	2	30	0	30		2	0	2		1	0	1		4	4		1	2		29	3	26	2	0	15	6	0	0	1	1	1	0	0		1	1	1
1	4	3	1.016	1	1.004	0	1	1	1	1	1	1	2	22	0	22		3	0	3		2	0	2		6	4		4	3		29	1	28	1	1	13	6	0	0	0		0	0	0		0	1	1
0	4	6	1.023	6	1.027	0	0	0	0	0	1	1	1	33	0	33		1	0	1		4	0	4		6	4		4	4		29	5	24	2	1	15	6	0	0	1	1	1	0	0		0	1	1
1	4	2	1.007	1	1.001	0	1	1	1	1	1	0	1	26	0	26		1	0	1		2	0	2		6	4		5	4		29	3	26	1	1	15	6	0	0	0		0	0	0		0	1	1
0	4	5	1.022	6	1.024	0	1	1	0	0	1	1	2	26	0	26		0	0	0		2	1	1		6	4		5	4		29	2	27	2	1	16	6	0	0	1	2	0	1	0		1	1	1
1	4	5	1.022	1	1.001	0	1	1	0	1	1	0	1	12	0	12		3	0	3		1	0	1		6	4		2	2		18	2	16	1	0	15	3	1	1	1	1	1	0	0		1	2	1
0	4	4	1.02	5	1.021	0	1	1	0	0	1	1	2	20	0	20		4	0	4		5	4	1		6	4		3	4		13	0	13	2	0	13	3	1	1	0		0	0	0		1	1	1
1	4	6	1.031	1	1.001	0	0	0	0	1	1	0	2	22	0	22		3	0	3		0	1	-1		3	3		2	2		16	1	15	1	0	13	3	1	1	0		0	0	0		1	1	1
0	4	5	1.021	6	1.02	0	1	1	0	0	1	1	1	10	0	10		2	0	2		0	1	-1		4	4		3	3		7	1	6	2	0	10	3	1	1	1	2	0	1	0		0	1	1
1	4	6.5	1.027	2	1.005	0	0	0	0	1	1	1	1	18	0	18		3	1	2		2	0	2		6	4		5	4		22	4	18	1	0	10	3	1	1	1	1,2	1	1	0		1	2	1
0	4	5	1.019	5	1.021	0	1	1	1	0	1	1	2	22	0	22		1	0	1		1	0	1		6	4		4	3		12	1	11	2	0	11	3	1	1	0		0	0	0		0	1	1
1	4	6	1.028			0	0		0		1																								1	0	12	3	1	1	0		0	0	0		0	1	1
0	4	6	1.031	6	1.031	0	0	0	0	0	1	1	1	17	0	17		1	0	1		3	0	3		6	4		4	3		22	3	19	2	0	15	3	1	1	1	1	1	0	0		1		1
1	4	4	1.017	1	1.001	0	1	1	1	1	1	0	1	24	0	24		2	0	2		2	2	0		6	4		2	2		14	0	14	1	1	13	4	1	1	0		0	0	0		1	1	1
0	4	6	1.026	3	1.011	0	0	0	0	1	1	1	2	12	1	11		1	0	1		1	1	0		6	4		2	2		7	1	6	2	0	11	3	1	1	1	1	1	0	0		0	1	1
0	4	3	1.015	5	1.025	0	1	1	1	0	1	1	2	17	0	17		2	0	2		0	1	-1		6	5		4	4		28	0	28	2	1	11	3	1	1	1	2	0	1	0		1	2	1
0	4	6	1.02	7	1.029	0	0	0	0	0	1	1	1	17	0	17		2	2	0		0	2	-2		4	4				1	15	1	14	2	0	11	3	1	1	1	1	1	0	0		1	1	1
1	4	4	1.02	3	1.016	0	1	1	0	1	1	1	1	22	0	22		4	0	4		2	0	2		5	4		2	2		8	0	8	1	0	15	3	1	1	0		0	0	0		1	1	1
0	4	3	1.015	4	1.016	0	1	1	1	1	1	1	2	18	0	18		2	0	2		3	0	3		5	4		2	2		19	1	18	2	0	12	4	1	1	0		0	0	0		0	1	1
1	4	4.5	1.02	1	1.001	0	1	1	0	1	1	0	2	12	0	12		4	1	3		0	4	-4		4	4		3	3		2	1	1	1	1	15	4	1	1	1	1	1	0	0		0	1	1
1	4	6	1.024	1	1.001	0	0	0	0	1	1	0	1	22	0	22		4	0	4		4	0	4		6	4		2	3		29	5	24	1	0	13	4	1	1	0		0	0	0		0	1	1
1	4	4	1.02	1	1.001	0	1	1	0	1	1	0	1	14	0	14		5	0	5		2	2	0		6	4		2	2		29	4	25	1	0	11	4	1	1	1	1	1	0	0		1	2	1
0	4	6.5	1.026	7	1.027	0	0	0	0	0	1	1	2	13	0	13		6	0	6		2	2	0		5	4		2	2		19	1	18	2	0	14	4	1	1	1	1	1	0	0		1	1	1
1	4	3	1.013	1	1.001	0	1	1	1	1	1	0	2	27	0	27		3	0	3		2	1	1		6	5				2	17	2	15	1	0	12	3	1	1	1	1	1	0	0		1		1
0	4	4	1.019	4	1.019	0	1	1	1	1	1	1	1	27	0	27		2	3	-1					1	3	3		5	4		29	2	27	2	0	10	3	1	1	0		0	0	0		0	1	1
1	4	2	1.009	3	1.015	0	1	1	1	1	1	1	1	15	0	15		2	0	2		2	1	1		5	5				1	18	3	15	1	1	11	3	1	1	0		0	0	0		1		1
0	4	3	1.017	3	1.016	0	1	1	1	1	1	1	2	10	0	10		0	0	0		1	0	1		2	2		1	2		3	0	3	2	1	12	3	1	1	1		0	0	0		1	1	1
1	4	5	1.027	1	1.001	0	1	1	0	1	1	0	2	17	0	17		2	0	2		1	3	-2		4	4		2	2		22	4	18	1	0	13	3	1	1	1	1	1	0	0		0	1	1
0	4	3	1.015	3	1.013	0	1	1	1	1	1	1	1	12	0	12		1	1	0		4	0	4		4	3		2	2		29	1	28	2	1	10	3	1	1	1	1	1	0	0		1	1	1
1	4	4	1.021	2	1.004	0	1	1	0	1	1	1	1	30	0	30		2	0	2		2	0	2		5	4		7	5		24	1	23	1	1	15	5	1	1	1	1	1	0	0		1		1
0	4	4	1.018	6	1.026	0	1	1	1	0	1	1	2	14	0	14		3	0	3		1	1	0		4	4		3	3		7	0	7	2	1	11	3	1	1	1	1	1	0	0		1		1
1	4	4	1.02	3	1.013	0	1	1	0	1	1	1	2	16	0	16		3	0	3		3	1	2		3	3		2	2		8	0	8	1	1	11	3	1	1	1	1	1	0	0		1		1
[truncated: 39 more columns]
